# Supplementary material for: Members of Glycosyl-Hydrolase Family 17 of A. fumigatus Differentially Affect Morphogenesis
Source: PubMed Central journal article supplement (PMC5872321; doi:10.3390/jof4010018), 2018-01-30
Supplement: jof-04-00018-s001.pdf [file jof-04-00018-s001.pdf]

# Members of Glycosyl-Hydrolase family 17 of *A. fumigatus* differentially affect morphogenesis

Nicolas Millet, Jean-Paul Latgé and Isabelle Mouyna \*

Aspergillus Unit, Institut Pasteur, 25 rue du Docteur Roux, 75015 Paris, France; nicolas.millet@pasteur.fr (N.M.); jplatge@pasteur.fr (J.-P.L.)

\* Correspondence: imouyna@pasteur.fr; Tel.: +33-145688225; Fax: +33-140613419

**Table S1.** Primers used in the present study.

| Primers     | Sequences                                   | Restriction site |
|-------------|---------------------------------------------|------------------|
| BGT1_forw1  | AATTCGAGCTCGGTACGATATCTAATGAGCCCTGAAGGCAGA  | <i>EcoRV</i>     |
| BGT1_rev1   | GGACCTGAGTGATGCGGGCAATGTTAGCAACCTA          |                  |
| BGT1_forw2  | TGGTCCATCTAGTGCCCCGAAGTGCTCTACCGAAAG        |                  |
| BGT1_rev2   | GCCAAGCTTGCATGCCGATATACCCAAATCCCATCAAATCCA  | <i>EcoRV</i>     |
| BGT2_forw1  | AATTCGAGCTCGGTACTGCGCACTCGGAGCAATCAAATCCAT  | <i>FspI</i>      |
| BGT2_rev1   | GGACCTGAGTGATGCTGGAAGTACGGGTAGCCATC         |                  |
| BGT2_forw2  | TGGTCCATCTAGTGCCCAAGACCTACTGGGACGAG         |                  |
| BGT2_rev2   | GCCAAGCTTGCATGCCITGCGCAATCGGGGCTATTAGCAGGAC | <i>FspI</i>      |
| BGT3_forw1  | AATTCGAGCTCGGTACTGCGCACGGATCAATTGACTCGACCT  | <i>FspI</i>      |
| BGT3_rev1   | GGACCTGAGTGATGCAGCAATGACAGCGGAGAACT         |                  |
| BGT3_forw2  | TGGTCCATCTAGTGCTTCGATAGCTCTTGGCACCT         |                  |
| BGT3_rev2   | GCCAAGCTTGCATGCCITGCGCAGTCGATTGCTGCGATCAGTA | <i>FspI</i>      |
| SCW4_forw1  | AATTCGAGCTCGGTACCCCGGGGAGACCGTTTCTCAAGTG    | <i>SmaI</i>      |
| SCW4_rev1   | GGACCTGAGTGATGCCGTTGAATCTTCTGGGCAAT         |                  |
| SCW4_forw2  | TGGTCCATCTAGTGCGTCCTGTGGAGGTTAGCTG          |                  |
| SCW4_rev2   | GCCAAGCTTGCATGCCCCCGGGGAGTCTGGTACTCCCACCA   | <i>SmaI</i>      |
| SCW11_forw1 | AATTCGAGCTCGGTACGATATCTATTGCCTCCCAGTCCAAAG  | <i>EcoRV</i>     |
| SCW11_rev1  | GGACCTGAGTGATGCGATCTGATTCGGTCGCAACT         |                  |
| SCW11_forw2 | TGGTCCATCTAGTGCAACATCCACCCCTTCTTCAA         |                  |
| SCW11_rev2  | GCCAAGCTTGCATGCCGATATCAGGATAACTGCCGCGATGT   | <i>EcoRV</i>     |
| BGT1qa      | AGAATCCAGCAGGTCCAGAAGG                      |                  |
| BGT1qb      | CCGTGCCATCAGCGAACTTG                        |                  |
| BGT2qa      | CGGTATCGTCGGCAGCACTC                        |                  |
| BGT2qb      | GGCGGCGGAGGAAGAAGAAG                        |                  |
| BGT3qa      | ATCCTGGCTTTCATCATCATTGGG                    |                  |
| BGT3qb      | CTTCGGTGGCTGTTTGTGTGG                       |                  |
| SCW4qa      | TCGCTTCGGCATCACCTACTC                       |                  |
| SCW4qb      | TGCTCAATGTCCTGGTTTATCTGG                    |                  |
| SCW11qa     | TCGTCGTCGGTAATGAGGCTATC                     |                  |
| SCW11qb     | GGCGGACTTGGCAGAGGAG                         |                  |
| TEFqa       | CCATGTGTGTCGAGTCCTTC                        |                  |
| TEFqb       | GAACGTACAGCAACAGTCTGG                       |                  |

**Table S2.** Single and multiple deleted strains used and constructed in this study.

| <b>Strain Names</b>                    | <b>Genotype</b>                                                                                        | <b>Source</b>                          |
|----------------------------------------|--------------------------------------------------------------------------------------------------------|----------------------------------------|
| Parental strain (WT)                   | A1163 <sup>ku80Δ</sup>                                                                                 | Da Silva Ferreira <i>et al.</i> , 2006 |
| <i>Δbgt1</i>                           | A1163 <sup>ku80Δ</sup> <i>Δbgt1::hygroR</i>                                                            | Gastebois A. <i>et al.</i> , 2010      |
| <i>Δbgt2</i>                           | A1163 <sup>ku80Δ</sup> <i>Δbgt2::hygroR</i>                                                            | Gastebois A. <i>et al.</i> , 2010      |
| <i>Δbgt3</i>                           | A1163 <sup>ku80Δ</sup> <i>Δbgt3::six-β-rec-hygroR-six</i>                                              | This Study                             |
| <i>Δscw4</i>                           | A1163 <sup>ku80Δ</sup> <i>Δscw4::six-β-rec-hygroR-six</i>                                              | This Study                             |
| <i>Δscw11</i>                          | A1163 <sup>ku80Δ</sup> <i>Δscw11::six-β-rec-hygroR-six</i>                                             | This Study                             |
| <i>Δscw4Δscw11 (Δ2)</i>                | A1163 <sup>ku80Δ</sup> <i>Δscw4::six/Δscw11::six-β-rec-hygroR-six</i>                                  | This Study                             |
| <i>Δscw4Δscw11Δbgt3 (Δ3)</i>           | A1163 <sup>ku80Δ</sup> <i>Δscw4::six/Δscw11::six/Δbgt3::six-β-rec-hygroR-six</i>                       | This Study                             |
| <i>Δscw4Δscw11Δbgt3Δbgt2 (Δ4)</i>      | A1163 <sup>ku80Δ</sup> <i>Δscw4::six/Δscw11::six/Δbgt3::six/Δbgt2::six-β-rec-hygroR-six</i>            | This Study                             |
| <i>Δscw4Δscw11Δbgt3Δbgt2Δbgt1 (Δ5)</i> | A1163 <sup>ku80Δ</sup> <i>Δscw4::six/Δscw11::six/Δbgt3::six/Δbgt2::six/Δbgt1::six-β-rec-hygroR-six</i> | This Study                             |

**Table S3.** Percentages of identities between the different proteins of the *A. fumigatus* GH17 family.

|       | Bgt2p | Bgt3p | Scw4P | Scw11P |
|-------|-------|-------|-------|--------|
| Bgt1p | 26    | 25    | 20    | 16     |
| Bgt2p |       | 10    | 14    | 9      |
| Bgt3p |       |       | 12    | 14     |
| Scw4P |       |       |       | 28     |

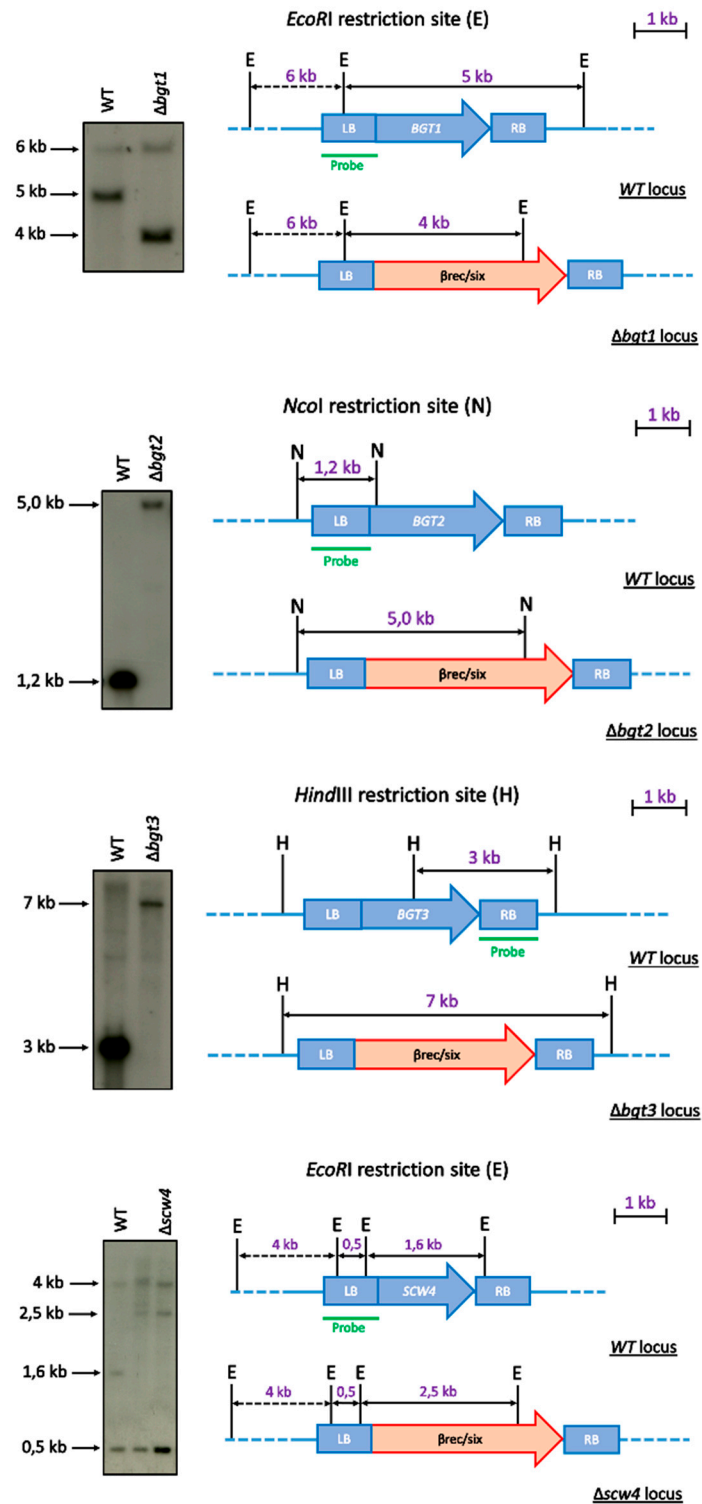

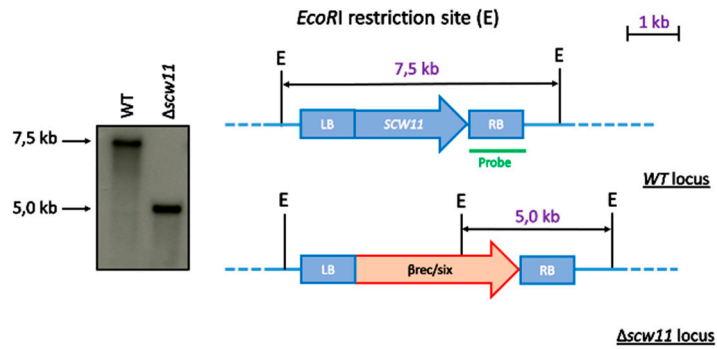

**Figure S1.** Construction of the deletion strains. Subsequent deletion of the GH17 genes family and verification by Southern blot.

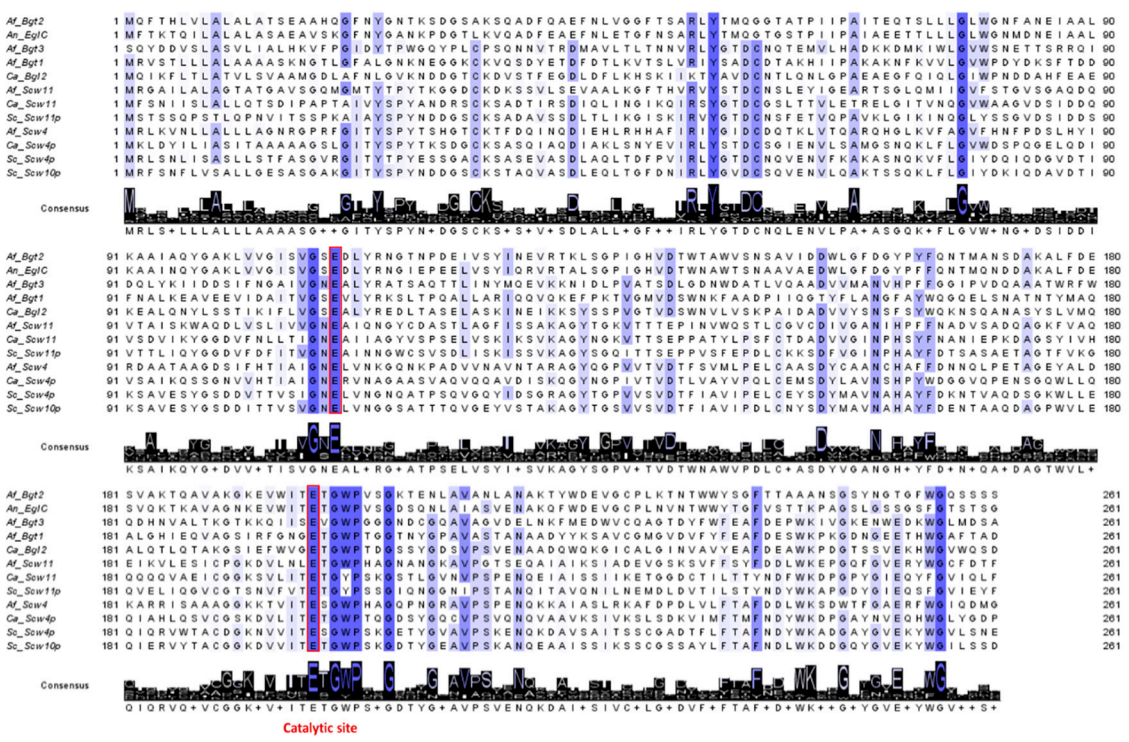

**Figure S2.** Protein alignment of the GH17 family of *A. fumigatus* (Af), *S. cerevisiae* (Sc), *C. albicans* (Ca), and *A. nidulans* (An). Conserved Amino acids between all proteins are highlighted in blue. Both glutamic acids, which are putative catalytic sites, are framed in red. After protein sequence alignment using MUSCLE v3.8.311, sequences were trimmed using TrimAl v3<sup>2</sup> to remove the spurious sequences or poorly aligned regions.

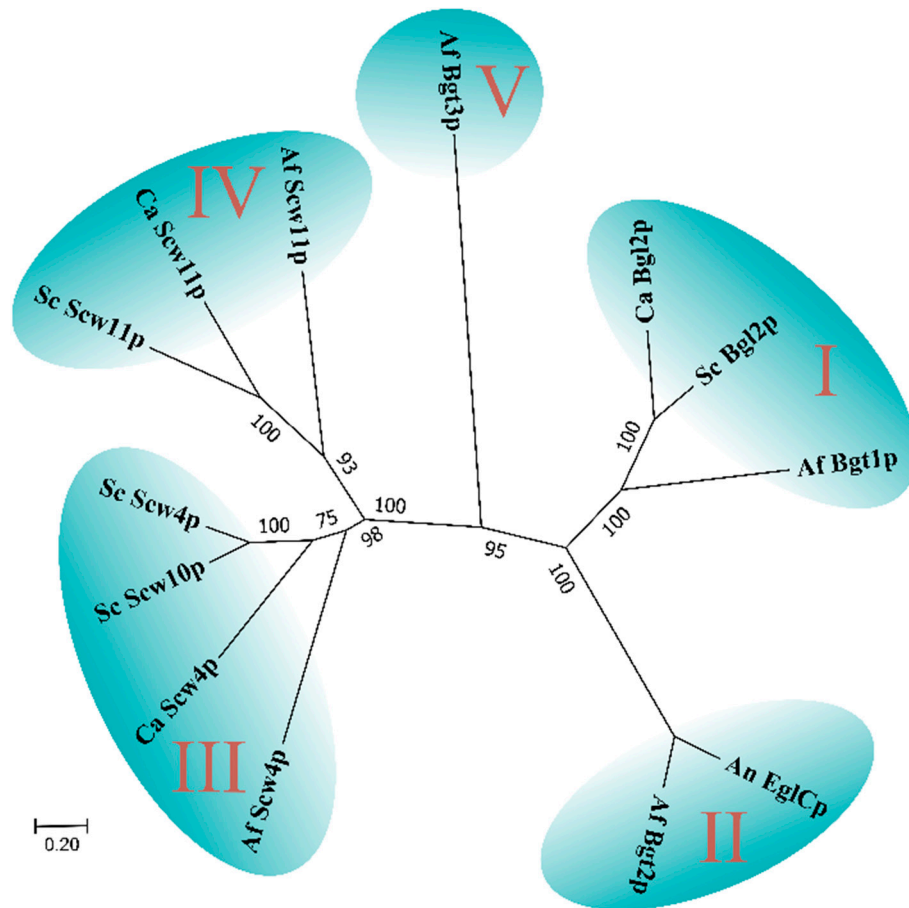

**Figure S3.** Non-rooted tree showing the maximum likelihood phylogenetic tree of the GH17 proteins of *A. fumigatus* (Af), *A. nidulans* (An), *S. cerevisiae* (Sc), and *C. albicans* (Ca). The protein sequences used have the following Pubmed accession numbers: For *A. fumigatus*: Bgt1p (AMO45773.1), Bgt2p (EAL86311.1), Bgt3p (Q4WUK5.1), Scw4p (XP\_751116.1), and Scw11p (XP\_747362.1); *A. nidulans*: (AAT90341.1); *S. cerevisiae*: Bgl2p (EGA58533), Scw10p (AJS99243.1), Scw4p (AJS06938.1), and Scw11p (AJS07159.1); *C. albicans*: Bgl2p (AOW28996.1), Scw11p (AOW29820.1), and Scw4p (AOW25936.1).

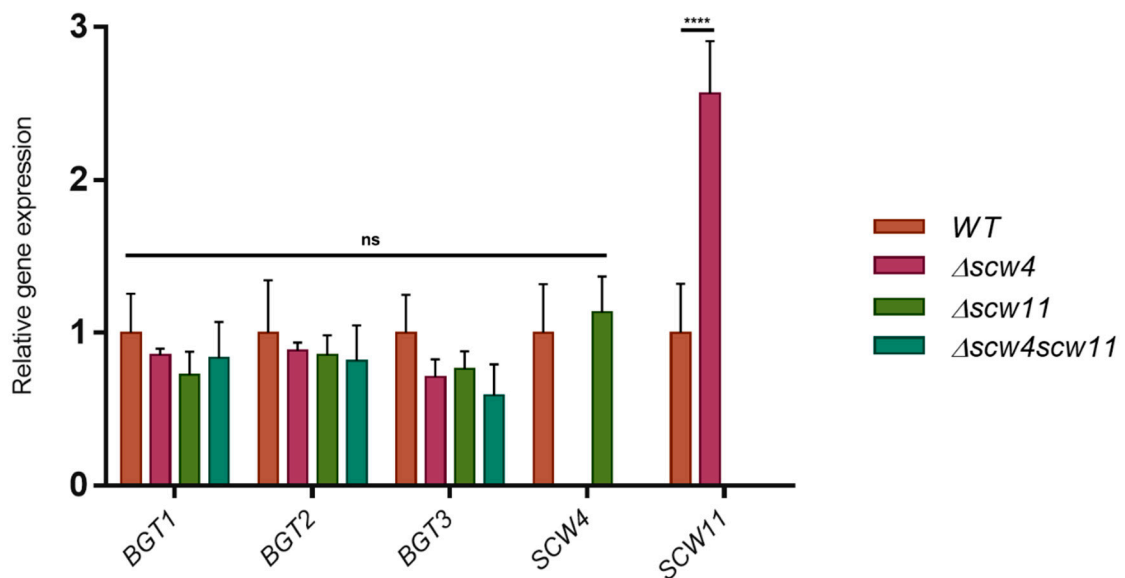

**Figure S4.** Gene expression of the five GH17 genes in the vegetative mycelium of the  $\Delta scw4$ ,  $\Delta scw11$ , and  $\Delta scw4scw11$  mutants and the parental strains after 16 h of growth in MM liquid medium (\*\*\*\* statistical significance between the parental and the mutant strain,  $p < 0.0001$ ). Gene expression was determined by real-time RT-PCR.
